# Supplementary material for: Enhanced electrical properties and stability of solution processed IYZO thin film transistors by controlling deep level oxygen vacancies
Source: Royal Society of Chemistry journal article supplement (doi:10.1039/d4tc05455e), 2025-01-01
Supplement: d4tc05455e1.pdf [file d4tc05455e1.pdf]

## Supporting Information

### **Enhanced Electrical Properties and Stability of Solution Processed IYZO Thin Film Transistor by Controlling of Deep Level Oxygen Vacancies.**

*Bu Kyeong Hwang<sup>1,2</sup>, Hyeon Woo Kim<sup>1,3</sup>, Bo Ram Lee<sup>1,2</sup>, Eun Jin Park<sup>1</sup>, Hyunsung Jung<sup>1</sup>, Min-Kyu Son<sup>1</sup>, Sung Beom Cho<sup>4,5</sup>, Hyeon Jin Jung<sup>1,\*\*\*</sup>, Moonsuk Yi<sup>2\*\*</sup>, and Soo Won Heo<sup>1,\*</sup>*

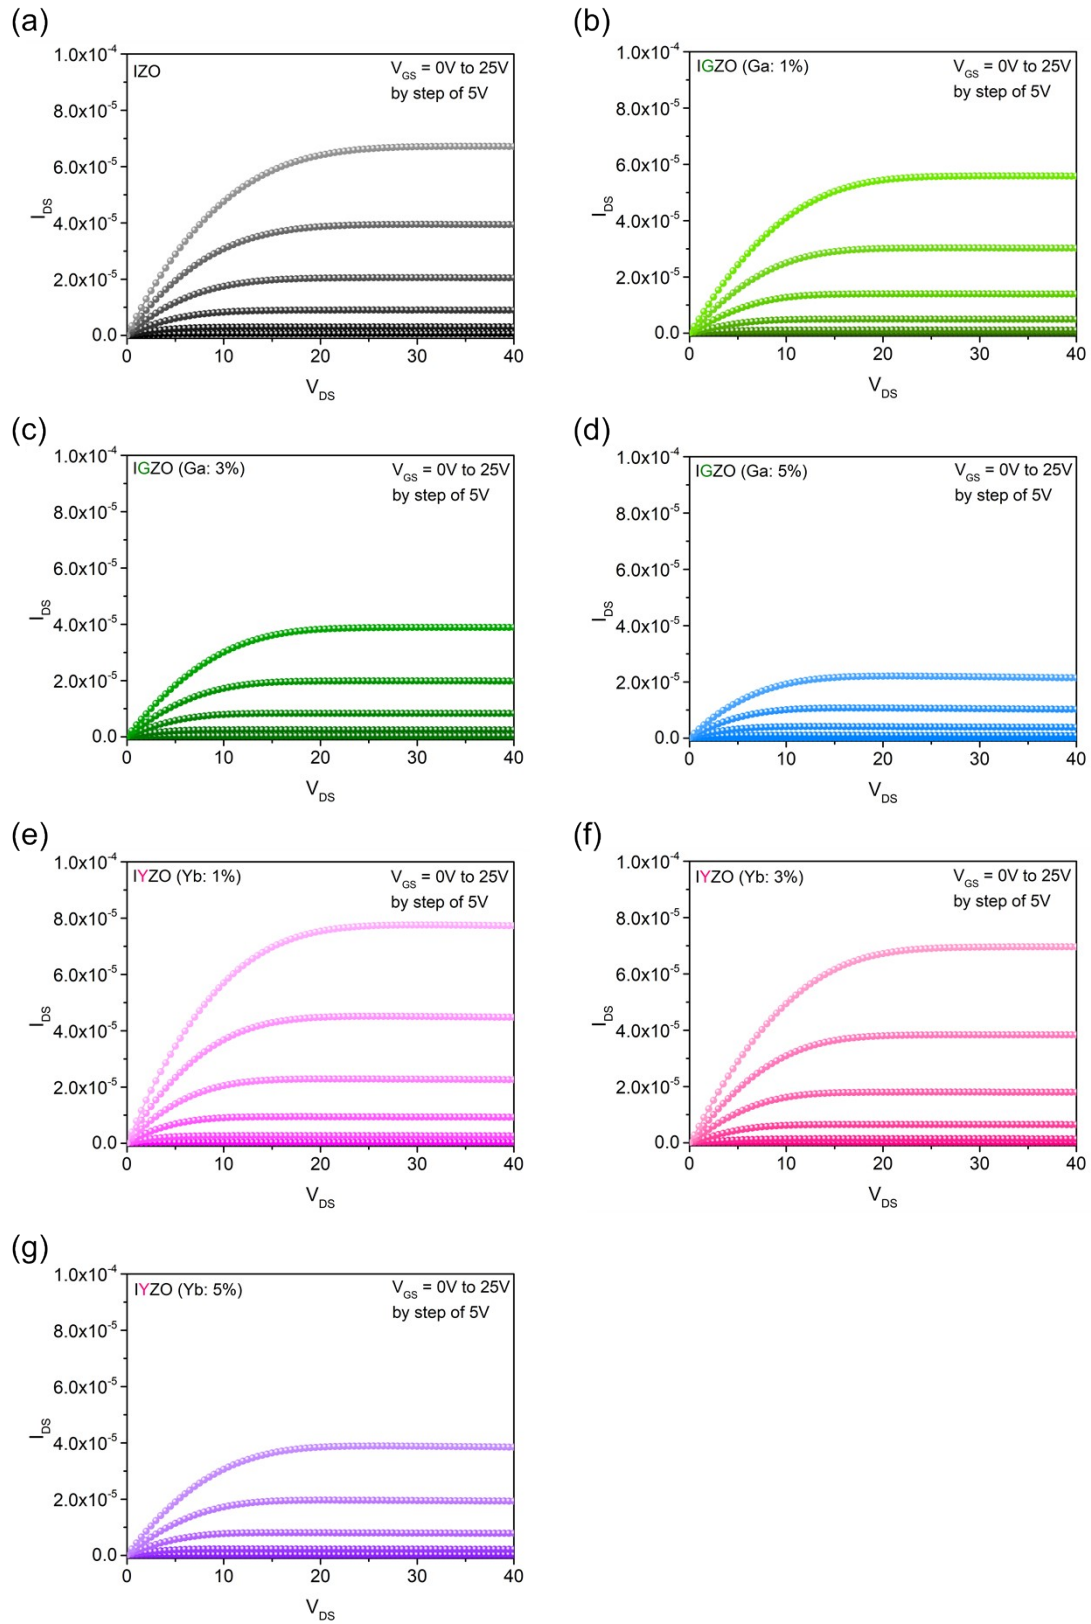

**Figure S1.** Output characteristics of the (a) IZO TFT, IGZO TFTs with (b) Ga: 1%, (c) Ga: 3%, (d) Ga: 5%, IYZO TFTs with (e) Yb: 1%, (f) Yb: 3%, and (g) Yb: 5%, respectively.

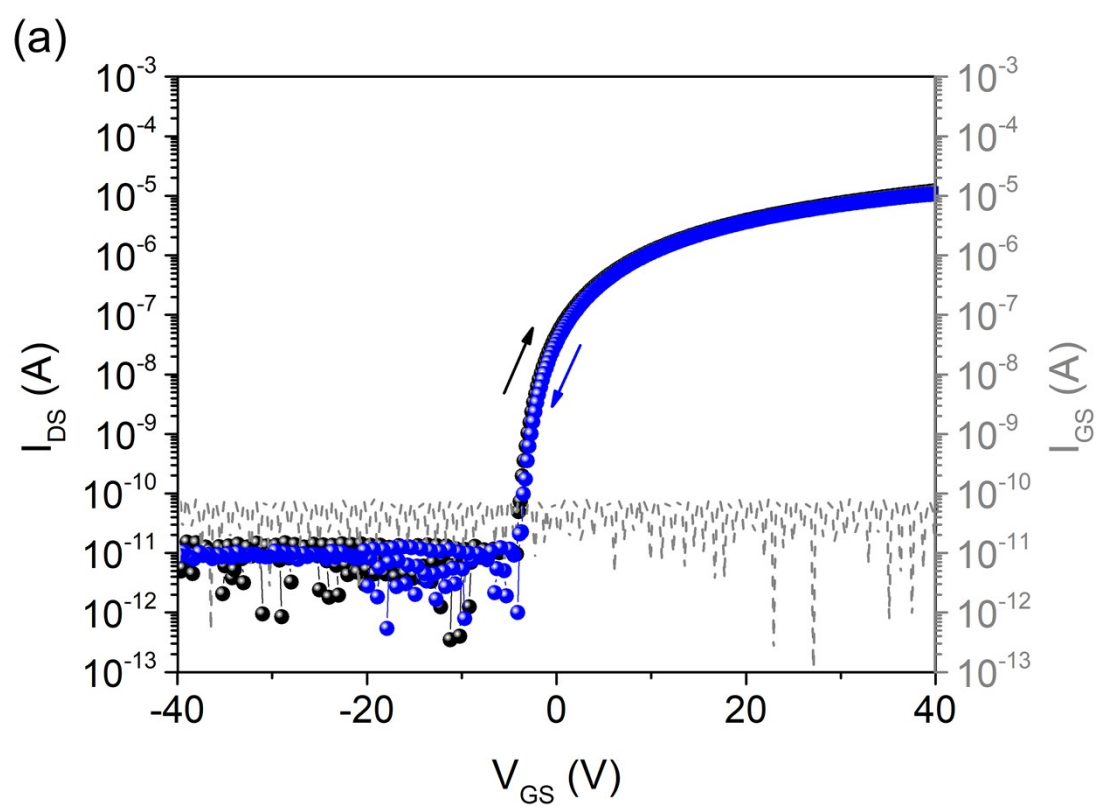

**Figure S2.** Full characteristics (trace, retrace) of the IYZO TFT.

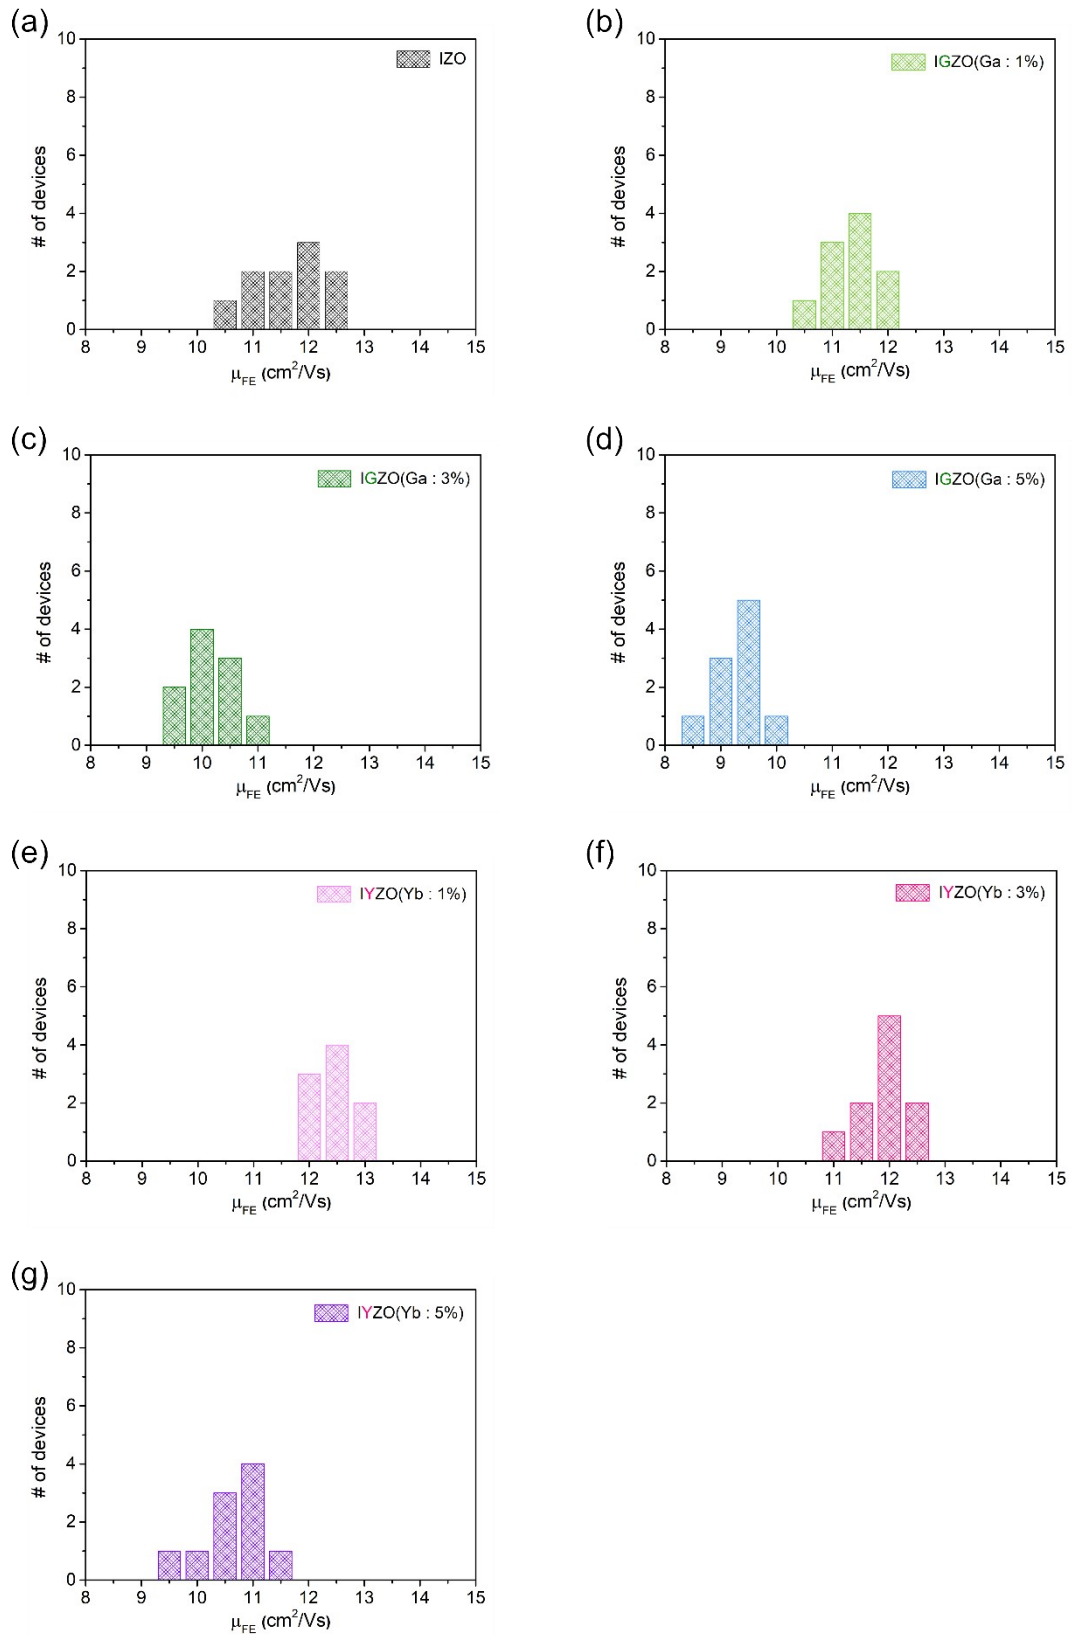

**Figure S3.** Mobility distributions of the (a) IZO TFT, IGZO TFTs with (b) Ga: 1%, (c) Ga: 3%, (d) Ga: 5%, IYZO TFTs with (e) Yb: 1%, (f) Yb: 3%, and (g) Yb: 5%, respectively.

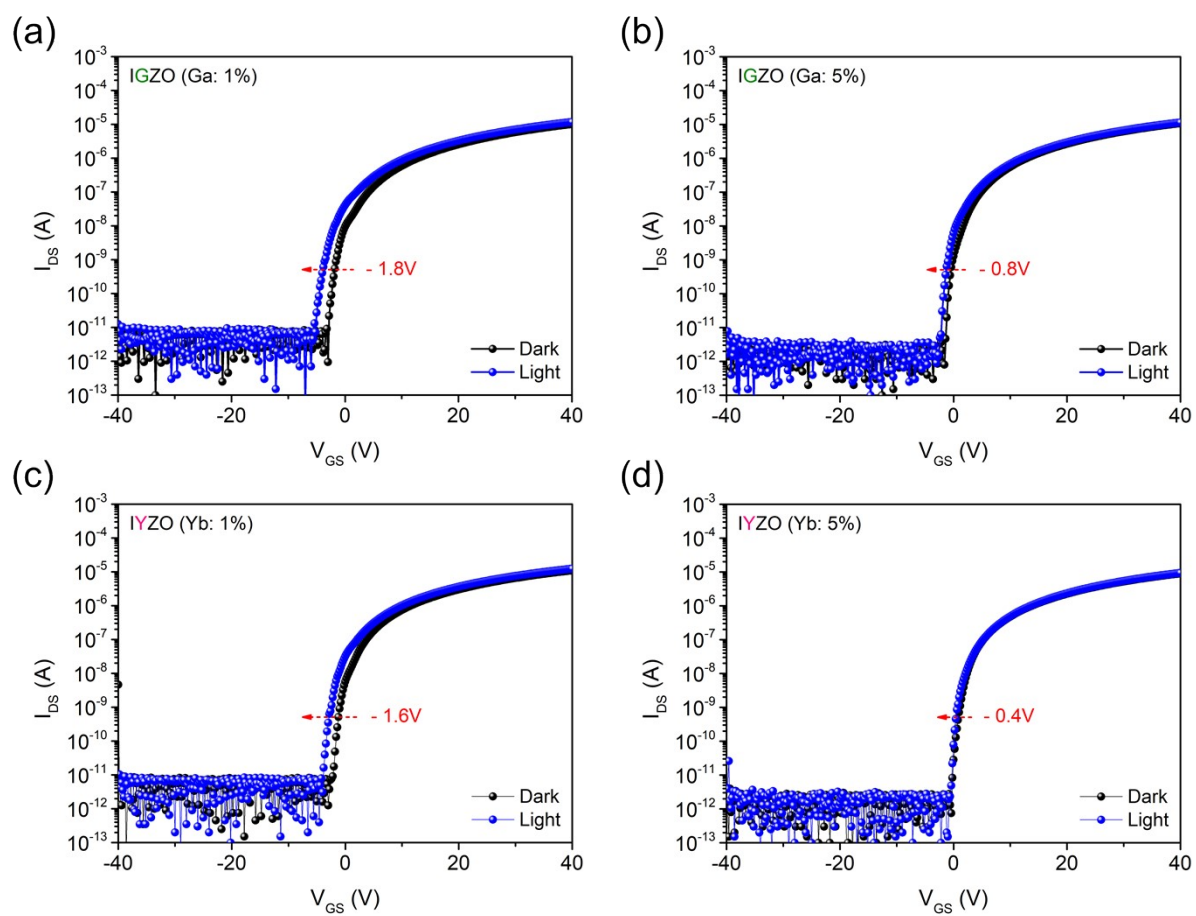

**Figure S4.** Photo-response of the IGZO TFTs with (a) Ga: 1%, (b) Ga: 5%, IYZO TFTs with (c) Yb: 1%, and (d) Yb: 5%, respectively.

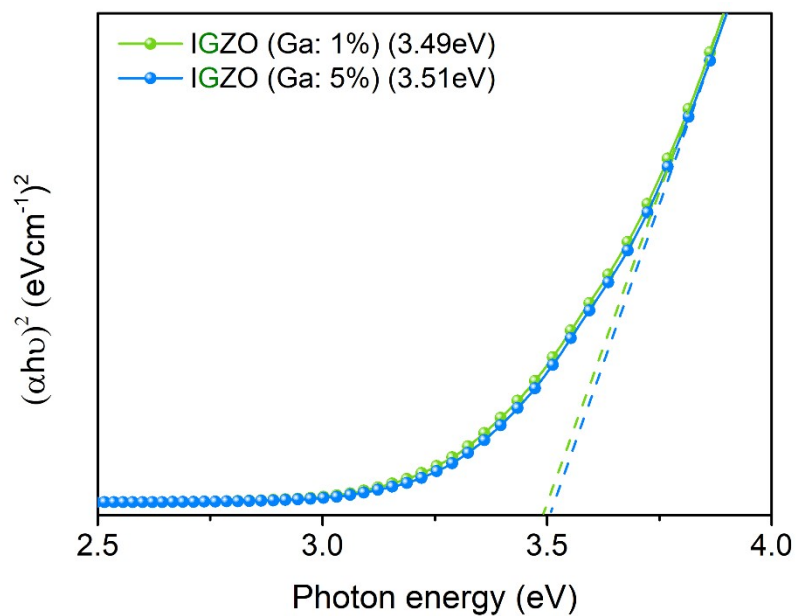

**Figure S5.** Optical band gap of the IGZO TFTs with Ga: 1%, 5%.

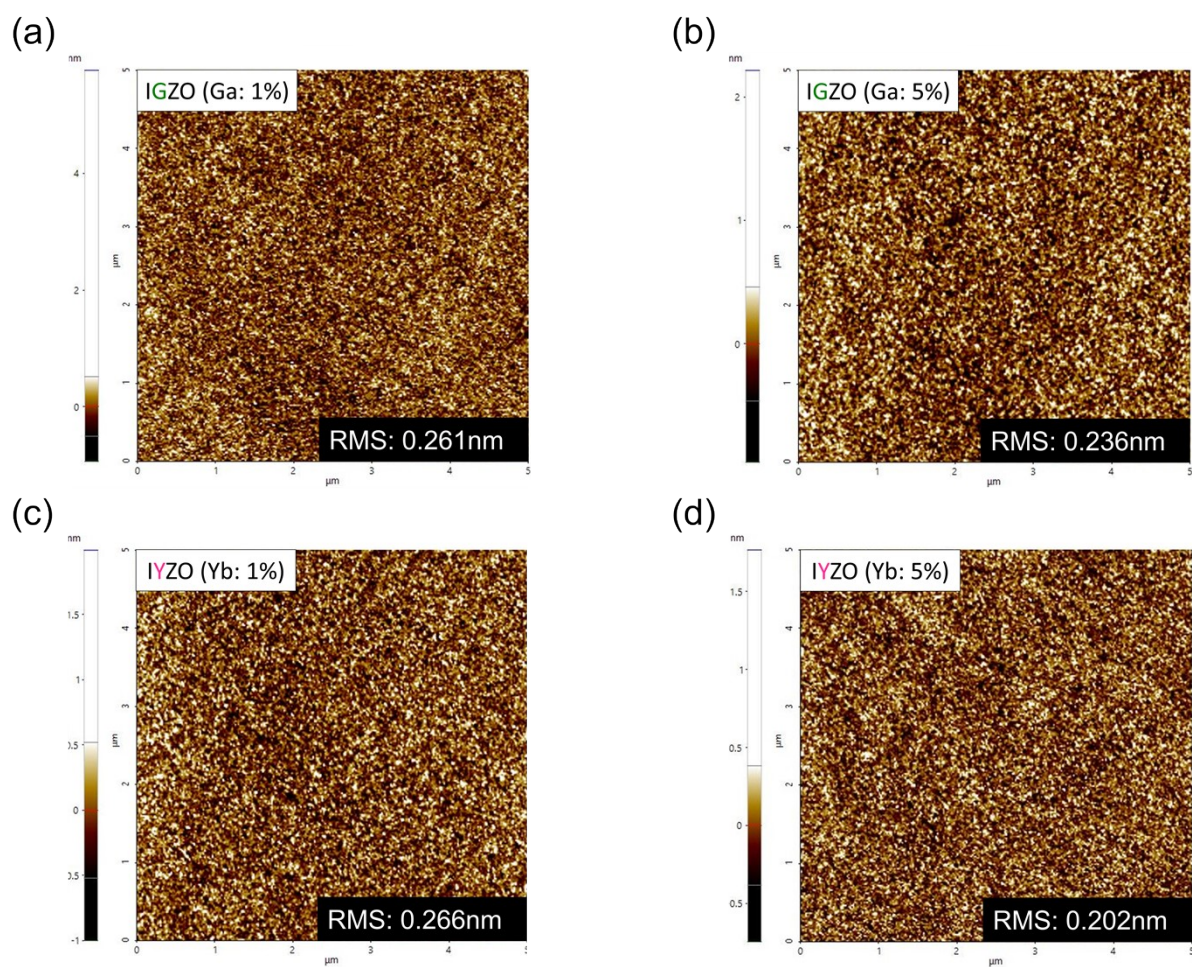

**Figure S6.** AFM images of (a) IGZO (Ga: 1%) film, (b) IGZO (Ga: 5%), (c) IYZO (Yb: 1%), and (d) IYZO (Yb: 5%) film, respectively.
